# Supplementary material for: Time-resolved cryo-EM (TR-EM) analysis of substrate polyubiquitination by the RING E3 anaphase-promoting complex/cyclosome (APC/C)
Source: PubMed Central journal article supplement (PMC10643132; doi:10.1038/s41594-023-01105-5), 2023-09-21

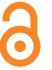

---

# **Time-resolved cryo-EM (TR-EM) analysis of substrate polyubiquitination by the RING E3 anaphase-promoting complex/cyclosome (APC/C)**

---

In the format provided by the authors and unedited

Supplementary Fig. 1

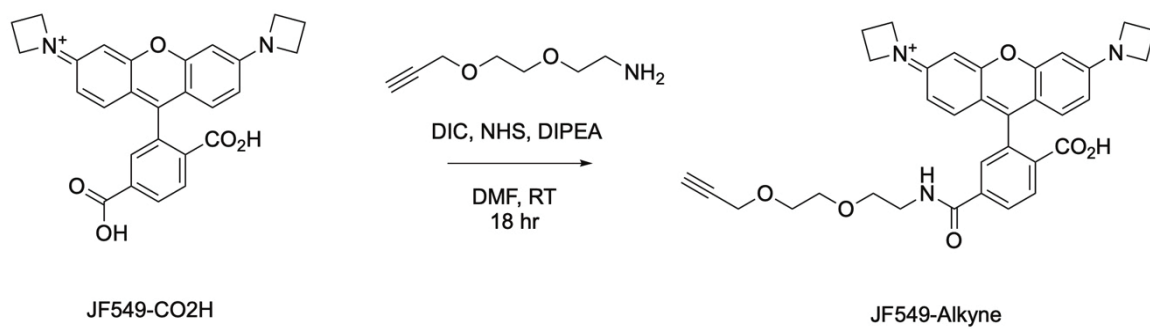

Supplement: 41594_2023_1105_MOESM1_ESM.pdf [file 41594_2023_1105_MOESM1_ESM.pdf]
